# Supplementary material
Source: MDPI journal article supplement (https://www.mdpi.com/2313-0105/9/3/178)
Supplement: s1 [file s1]

# Supplementary File

## Textile PAN Carbon Fibers Cathode for High-Voltage Seawater Batteries

**João Ferreira<sup>1,2,3</sup>, Tiago Salgueiro<sup>1,2,3</sup>, Jossano Marcuzzo<sup>4</sup>, Eduardo Arruda<sup>5</sup>, João Ventura<sup>2,3</sup> and Joana Oliveira<sup>1,6,\*</sup>**

<sup>1</sup> Department of Engineering Physics, Faculty of Engineering, University of Porto, Porto, 4200-465, Portugal; up201704185@edu.fc.up.pt (J.F.); up201704006@edu.fc.up.pt (T.S.)

<sup>2</sup> Department of Physics and Astronomy, Faculty of Science, University of Porto, Porto, 4169-007, Portugal; joventur@fc.up.pt

<sup>3</sup> Institute of Physics for Advanced Materials, Nanotechnology and Photonics (IFIMUP), Porto, 4169-007, Portugal

<sup>4</sup> JMHP—Consultoria em Materiais Ltda, Departamento de PDI, Jacarei, São Paulo, 12301-600, Brazil; jmhp@jmhp-carbon.com

<sup>5</sup> Faculdade de Ciências e Tecnologia (FACET)/Química, Fundação Universidade Federal da Grande Dourados—UFGD Unidade II, Dourados/MS, 79804-970, Brazil; [eduardoarruda@ufgd.edu.br](mailto:eduardoarruda@ufgd.edu.br)

<sup>6</sup> Associate Laboratory for Energy, Transports and Aerospace (LAETA), INEGI, Porto, 4200-465, Portugal

\*Correspondence: [jespain@fe.up.pt](mailto:jespain@fe.up.pt)

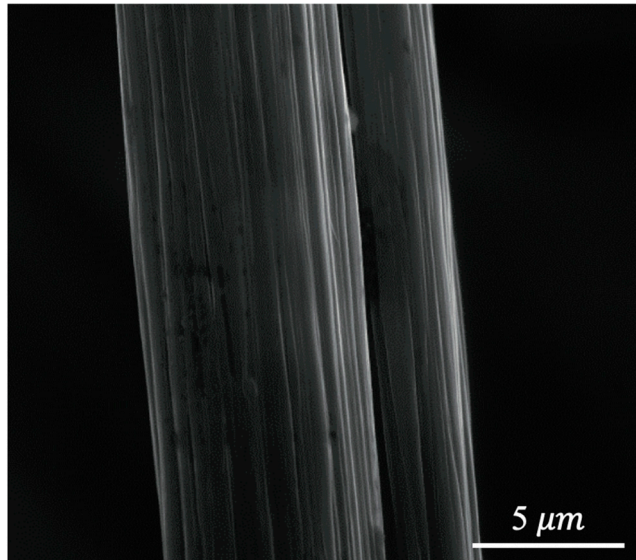

**Figure S1:** SEM image of a single fiber of the commercial PAN precursor before any treatment was applied at a 5 μm magnification [1].

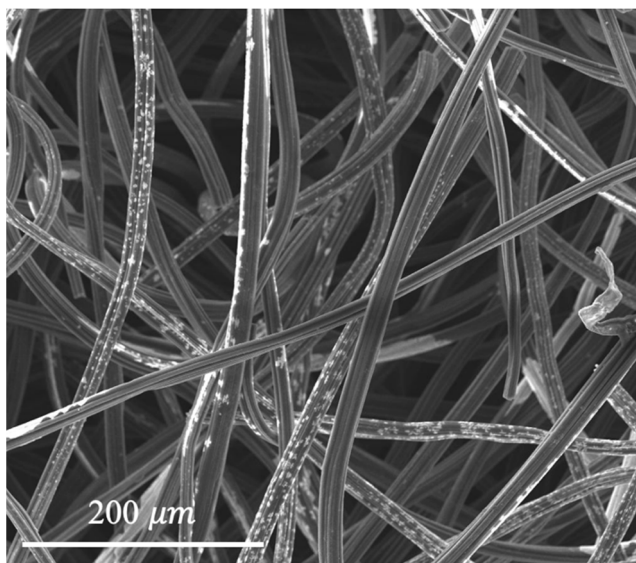

**Figure S2:** SEM image of the CCF carbon fibers with a 200 μm magnification.

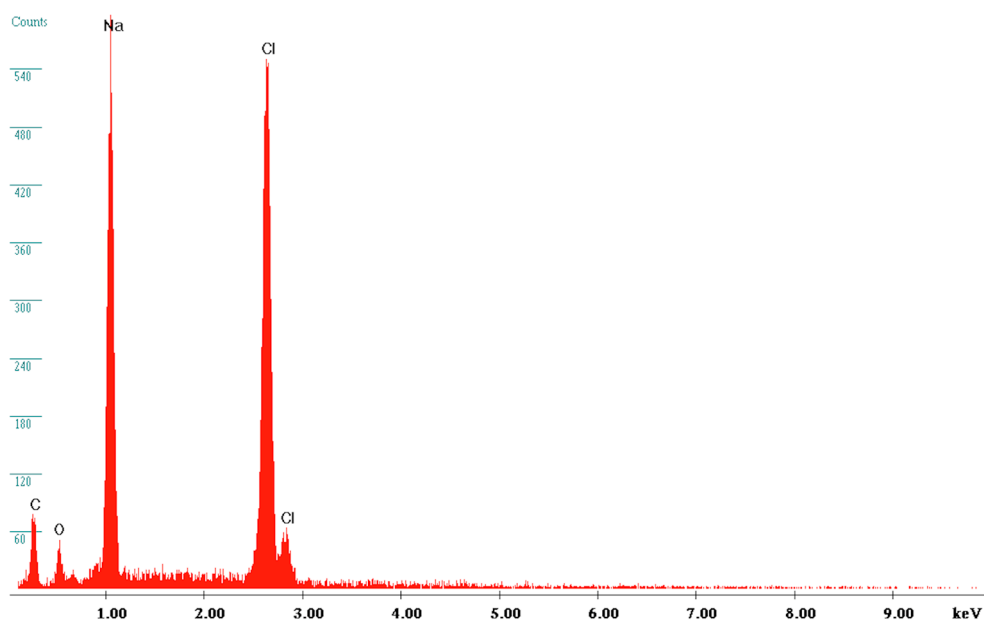

**Figure S3:** EDS analysis of the white spots on the surface of the CCF carbon fibers.

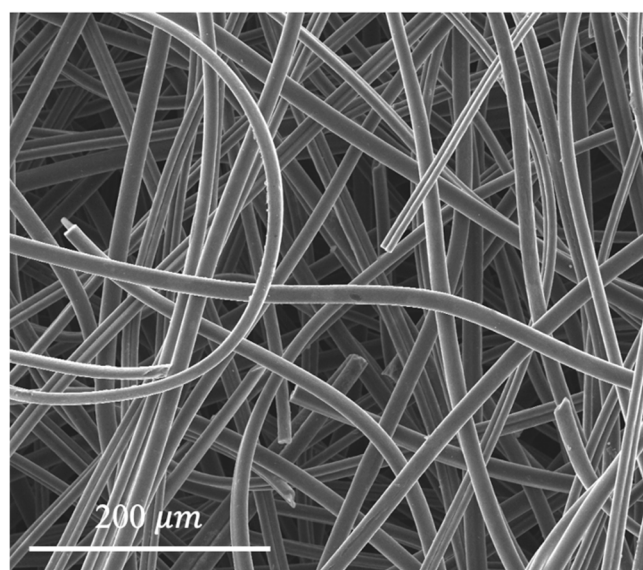

**Figure S4:** SEM image of the ACF carbon fibers with a 200 μm magnification.

#### Reference:

[1] Saldanha Marcuzzo, J.; Otani, C. Fibra de carbono ativada-Producao ultrarrapida a partir da PAN Textil Uma abordagem da producao e caracterizacao de fibra de carbono ativada a partir de materia prima textil, 1. aufl ed.; Novas Edicoes Academicas: Saarbrucken, 2015. OCLC: 913015440.
